# Supplementary material for: Inferring transcriptional gene regulation network of starch metabolism in Arabidopsis thaliana leaves using graphical Gaussian model
Source: PubMed Central journal article supplement (PMC3490714; doi:10.1186/1752-0509-6-100), 2012-08-16
Supplement: 1752-0509-6-100-S1.pdf [file 1752-0509-6-100-S1.pdf]

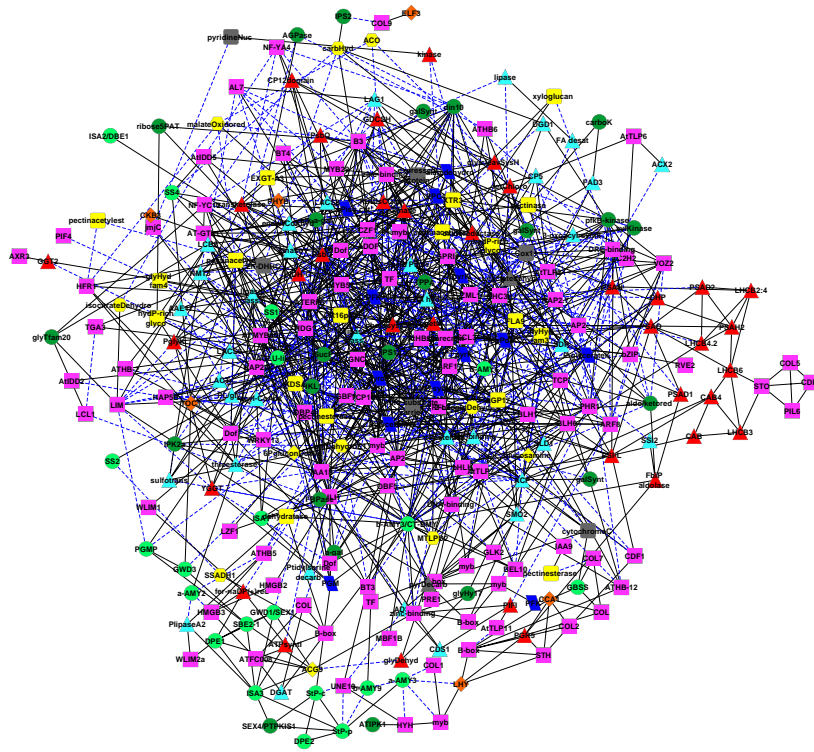

**Supplementary figure 1.1.** Gene association network of 106 TF, 6 clock, and 173 metabolic genes. The network contains 277 nodes and 1,174 edges. The metabolic genes were selected from 11 functional categories (defined by MapMan and shown in Table 2 in the main article). These 11 functional groups are related to carbon metabolism in a broader view.

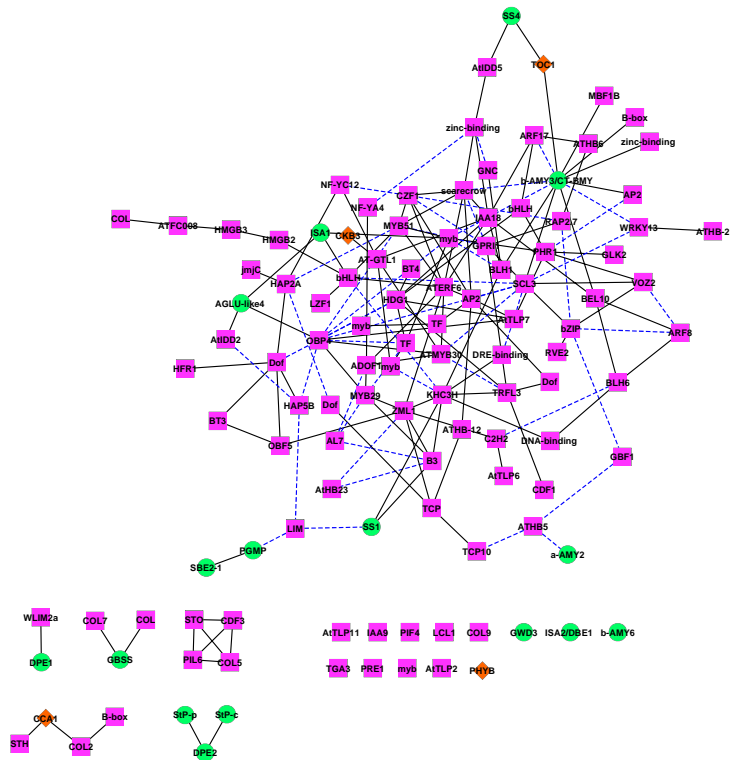

**Supplementary figure 1.2.** The intersection result of the networks constructed by starch genes (Figure 2 in the main article) and carbon-related genes (Supp. figure 1.1). This intersected network contains 177 nodes and 181 edges. All nodes in the starch network are in the carbon network and 68% of edges in the starch network were detected in the carbon network.

## Node symbols

|                                  |                                                                                     |
|----------------------------------|-------------------------------------------------------------------------------------|
| Clock                            |    |
| OPP                              |    |
| PS                               |    |
| Starch                           |    |
| TCA                              |    |
| TF                               |    |
| Cell wall                        |    |
| Fermentation                     |    |
| Gluconeogenesis                  |    |
| Glycolysis                       |   |
| Lipid                            |  |
| Major CHO                        |  |
| Minor CHO                        |  |
| Mitochondrial electron transport |  |
